# Supplementary material for: Atomically dispersed Co-based species containing electron withdrawing groups for electrocatalytic oxygen reduction reactions
Source: Royal Society of Chemistry journal article supplement (doi:10.1039/d4nr01635a), 2024-01-01
Supplement: d4nr01635a1.pdf [file d4nr01635a1.pdf]

Supporting Information for

**Atomically dispersed Co-based species containing electron withdrawing groups for electrocatalytic oxygen reduction reactions**

Yunseok Shin<sup>†</sup>, Sunggu Park<sup>†</sup>, Hanbi Jang, Gogyun Shin, Dongha Shin and Sungjin Park<sup>\*</sup>

Department of Chemistry and Chemical Engineering, Inha University, 100 Inha-ro, Michuholgu, Incheon 22212, Republic of Korea

E-mail: [sungjinpark@inha.ac.kr](mailto:sungjinpark@inha.ac.kr)

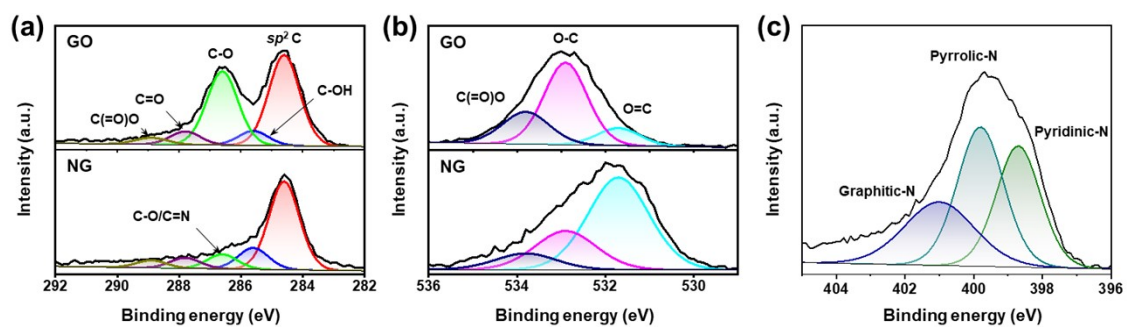

**Fig. S1** (a) Deconvoluted XPS C 1s spectra of GO and NG. (b) Deconvoluted XPS O 1s spectra of GO and NG. (c) Deconvoluted XPS N 1s spectrum of NG.

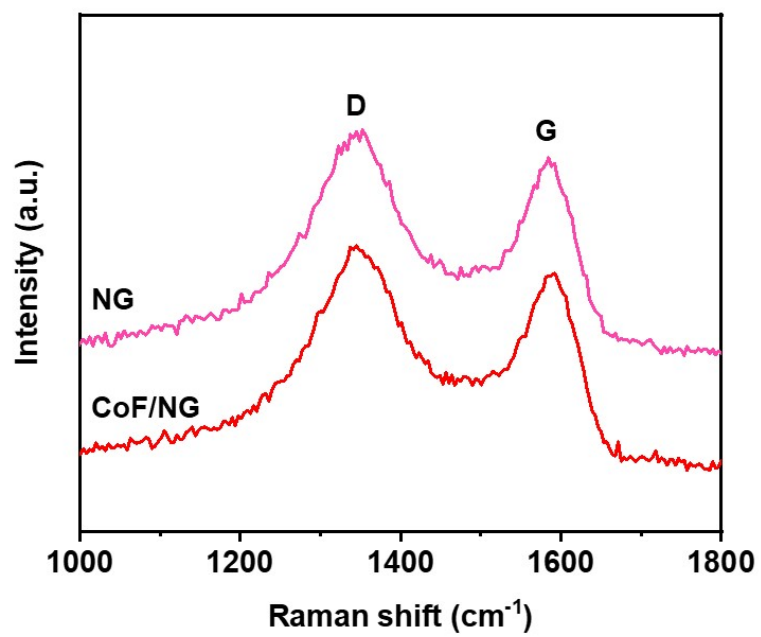

**Fig. S2** Raman spectra of NG and CoF/NG.

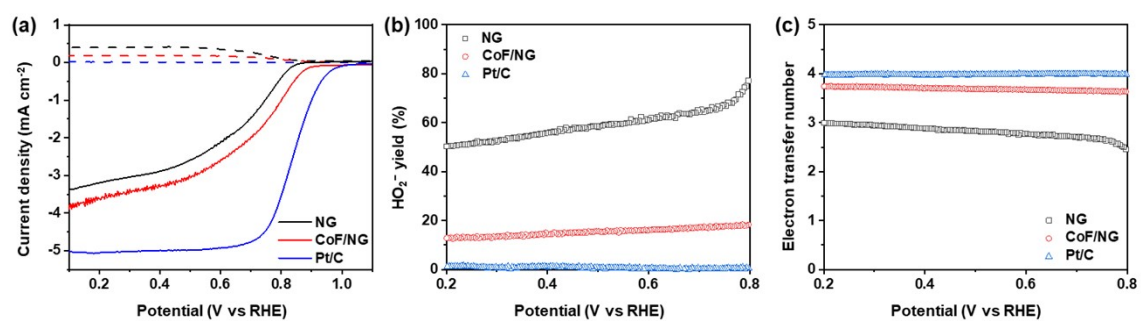

**Fig. S3** Electrocatalytic ORR properties of NG, CoF/NG, and Pt/C using an RRDE system. (a) LSV polarization curves, (b) calculated HO<sub>2</sub><sup>-</sup> yields, and (c) calculated electron transfer numbers.

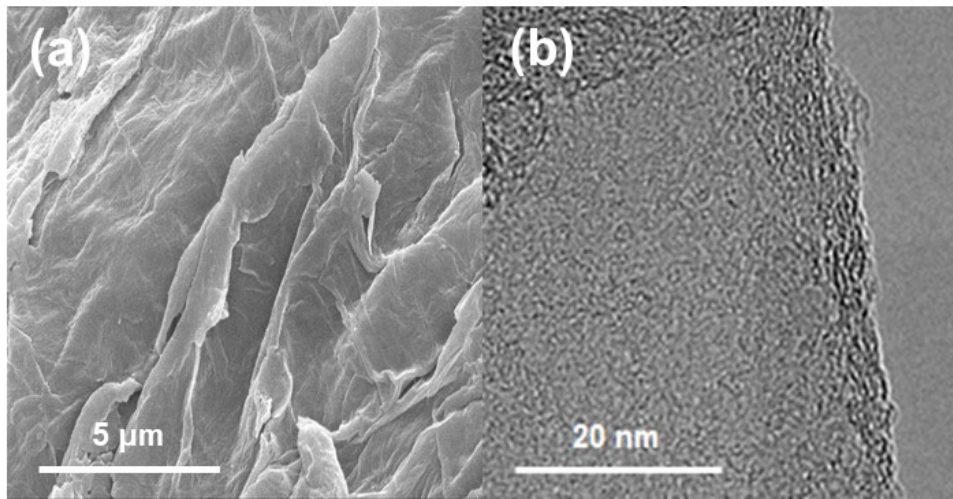

**Fig. S4** (a) SEM and (b) TEM images of CoF/ReG.

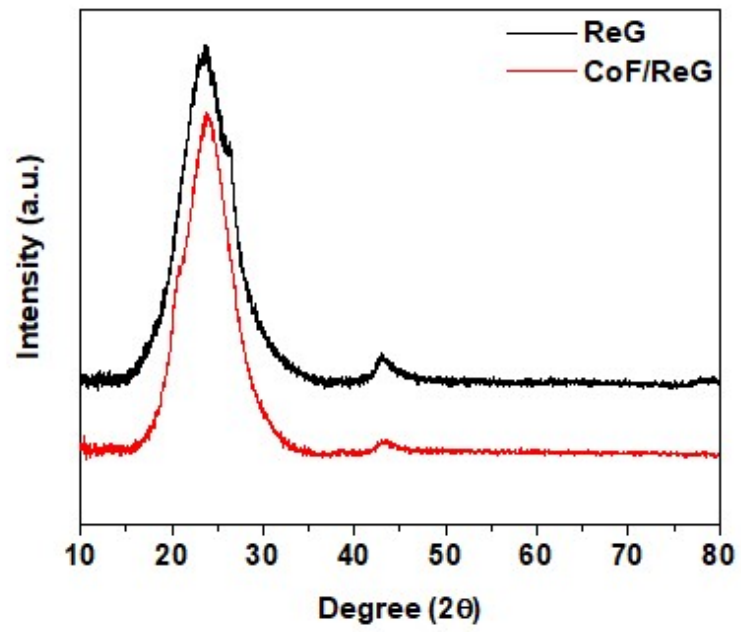

**Fig. S5** XRD patterns of ReG and CoF/ReG.

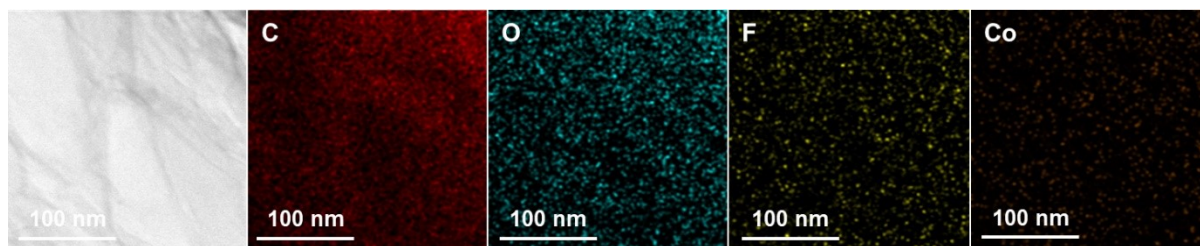

**Fig. S6** TEM elemental mapping images of CoF/ReG.

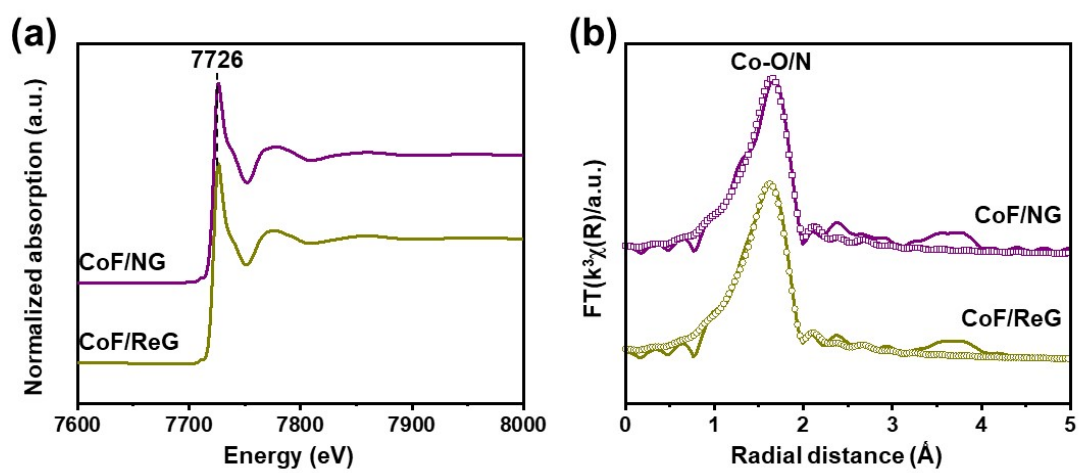

**Fig. S7** (a) XANES and (b) EXAFS fitting spectra of CoF/NG and CoF/ReG.



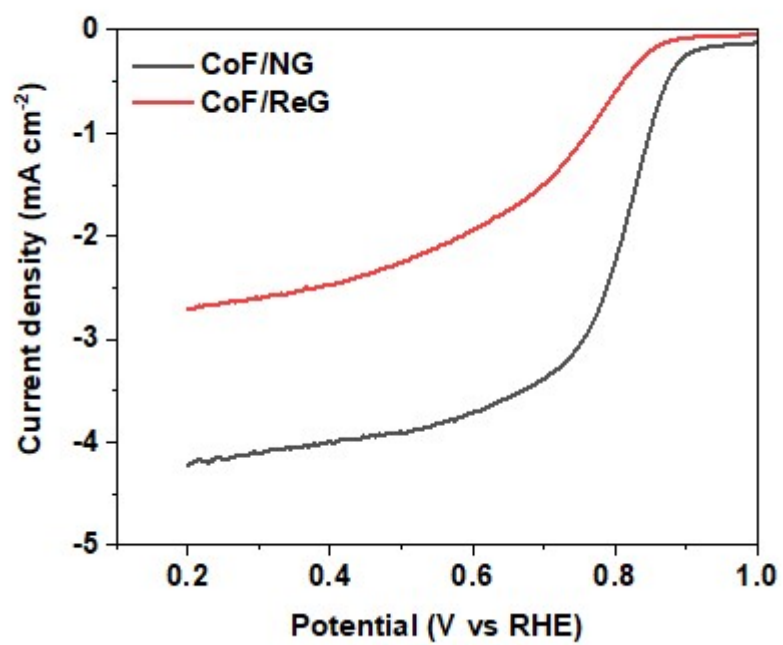

**Fig. S8** LSV polarization curves of CoF/NG and CoF/ReG.

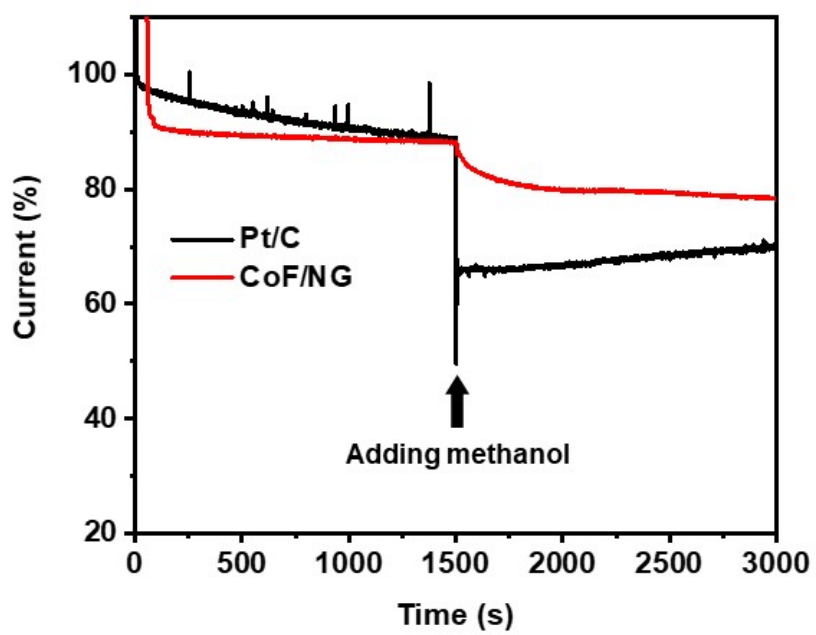

**Fig. S9** Methanol tolerance tests for CoF/NG and Pt/C.

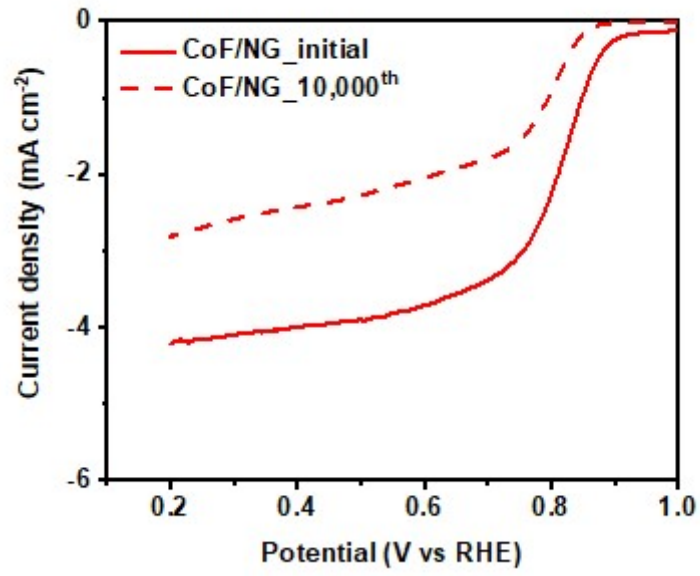

**Fig. S10** LSV polarization curves of CoF/NG\_initial and CoF/NG\_10,000<sup>th</sup>.

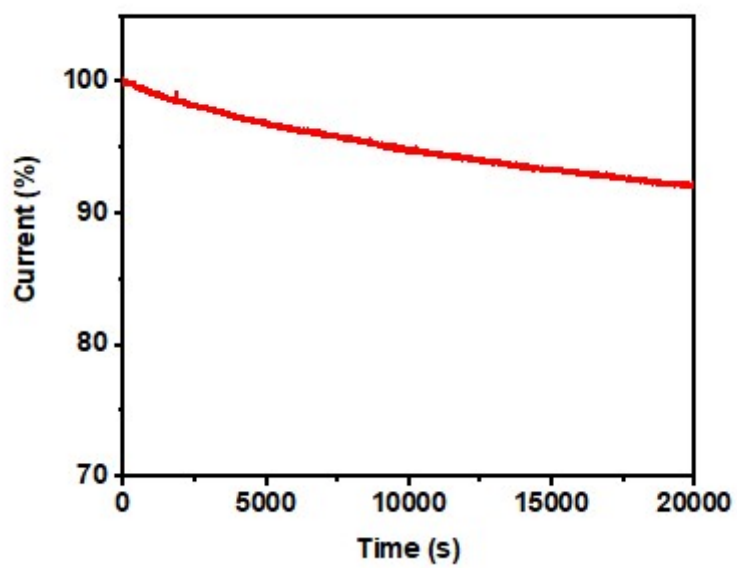

**Fig. S11** I-t curves of CoF/NG until 20,000 s.

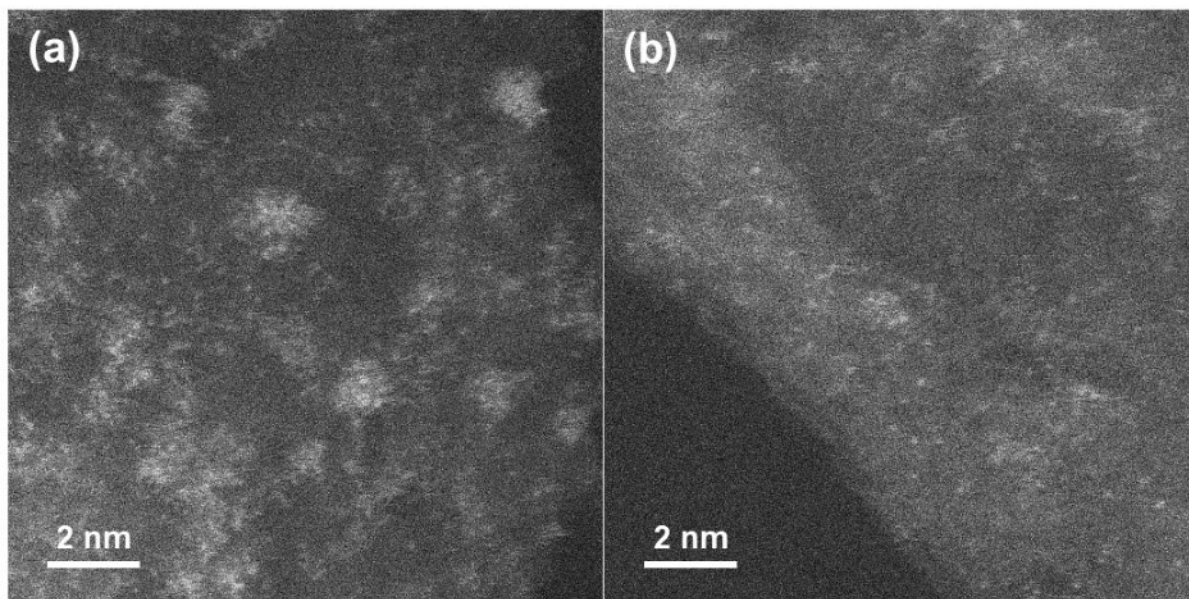

**Fig. S12** STEM images (a) CoF/NG-after-cycle and (b) Co(acac)<sub>2</sub>/NG-after-cycle.

**Table S1.** Atomic amounts of NG, ReG, CoF/NG, and CoF/ReG.

| Sample  | C (%) | O (%) | N (%) | F (%) | Co (%) |
|---------|-------|-------|-------|-------|--------|
| NG      | 78.7  | 13.9  | 7.4   | -     | -      |
| ReG     | 81.2  | 18.8  | -     | -     | -      |
| CoF/NG  | 80.4  | 9.5   | 8.4   | 1.1   | 0.6    |
| CoF/ReG | 82.6  | 16.2  | -     | 0.81  | 0.39   |

**Table S2.** Electrochemical performance of CoF/NG at RRDE system.

| Sample | Onset Potential (V) | Half-wave Potential (V) | $j_L$ (mA cm <sup>-2</sup> ) | HO <sub>2</sub> <sup>-</sup> yield @ 0.3 V (%) | Electron transfer number @ 0.3 V |
|--------|---------------------|-------------------------|------------------------------|------------------------------------------------|----------------------------------|
| NG     | 0.86                | 0.66                    | 3.50                         | 48.24                                          | 2.77                             |
| CoF/NG | 0.90                | 0.72                    | 3.61                         | 13.7                                           | 3.72                             |
| Pt/C   | 1.02                | 0.85                    | 5.50                         | 0.32                                           | 3.99                             |

**Table S3.** EXAFS fitting results of CoF precursor, CoF/NG, and CoF/ReG.

| Sample        | Bond    | N | So2   | $\sigma^2$ | C-N  | R (Å) |
|---------------|---------|---|-------|------------|------|-------|
| CoF precursor | Co-O    | 1 | 4.330 | 0.00518    | 7.89 | 2.05  |
| CoF/NG        | Co-O(N) | 1 | 3.801 | 0.00729    | 6.92 | 2.06  |
| CoF/ReG       | Co-O(N) | 1 | 3.938 | 0.00724    | 7.17 | 2.06  |



**Table S4.** Electrochemical performance results of CoF/NG and CoF/ReG.

| Sample  | Onset Potential (V) | Half-wave Potential (V) | $j_L$ (mA cm <sup>-2</sup> ) |
|---------|---------------------|-------------------------|------------------------------|
| CoF/NG  | 0.91                | 0.80                    | 4.22                         |
| CoF/ReG | 0.89                | 0.72                    | 2.70                         |
